# Supplementary material for: Temperature dependent NIR emitting lanthanide-PMO/silica hybrid materials
Source: Royal Society of Chemistry journal article supplement (doi:10.1039/c7dt01620d), 2017-01-01
Supplement: c7dt01620d1.pdf [file c7dt01620d1.pdf]

## Supporting Information

### Temperature dependent NIR emitting lanthanide-PMO/silica hybrid materials

Anna M. Kaczmarek,<sup>‡\*,a</sup> Dolores Esquivel,<sup>‡,b</sup> Judith Ouwehand,<sup>c</sup> Pascal Van Der Voort,<sup>c</sup>  
Francisco J. Romero-Salguero,<sup>b</sup> Rik Van Deun<sup>\*,a</sup>

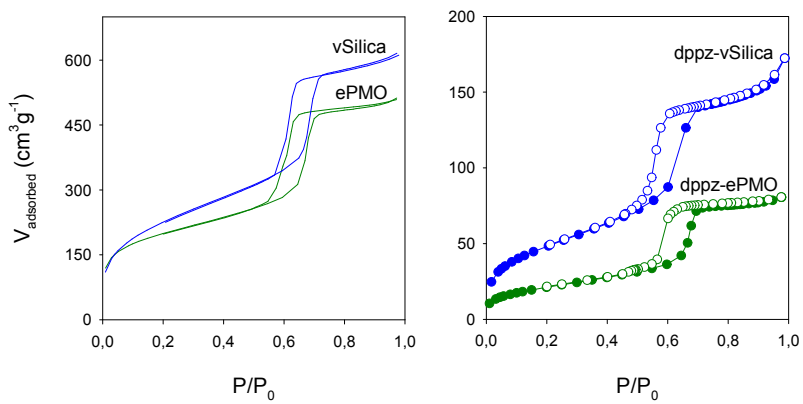

Fig. S1  $\text{N}_2$  adsorption-desorption isotherms of the parent materials (left) and dipyriddy-pyridazine functionalized materials (right).

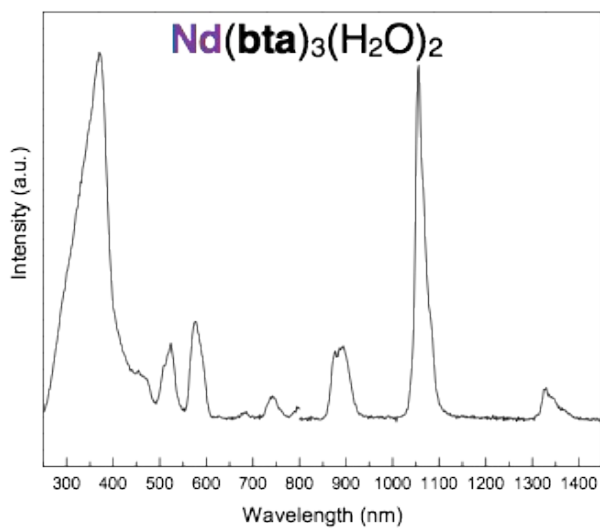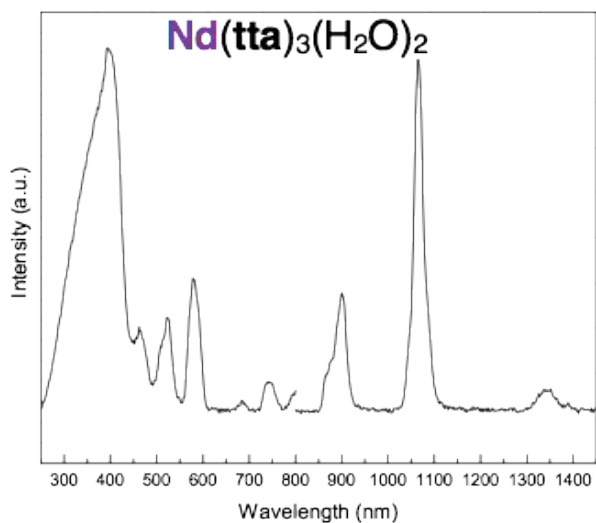

Fig. S2 Combined excitation-emission spectra of Nd<sup>3+</sup> β-diketonate complexes (the spectra were recorded by exciting into the maximum of the broad excitation band and observing at the maximum of the strongest emission peak).

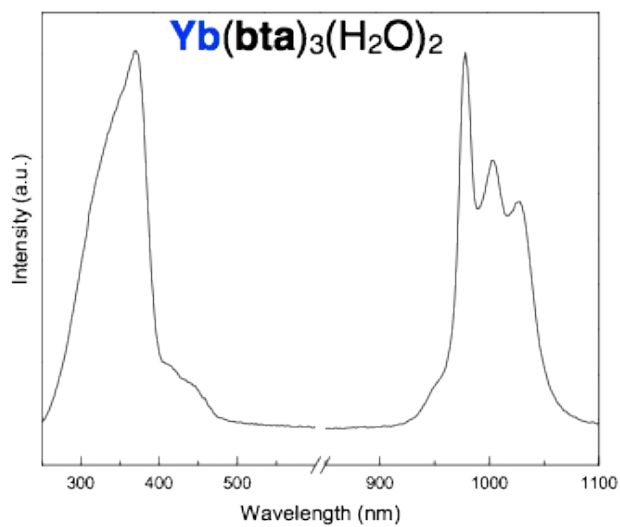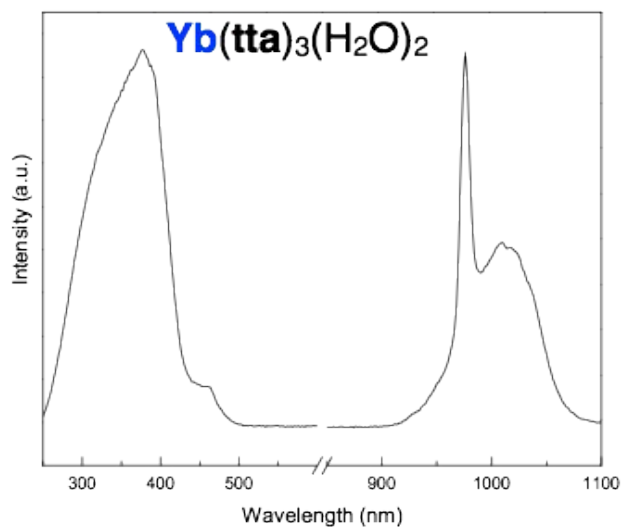

Fig. S3 Combined excitation-emission spectra of  $\text{Yb}^{3+}$   $\beta$ -diketonate complexes (the spectra were recorded by exciting into the maximum of the broad excitation band and observing at the maximum of the strongest emission peak).

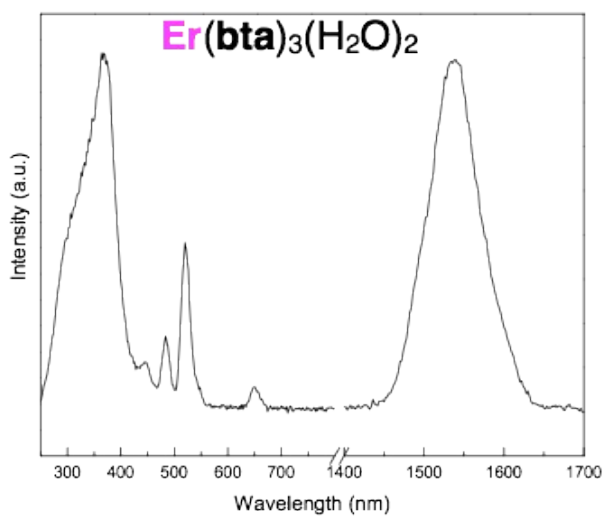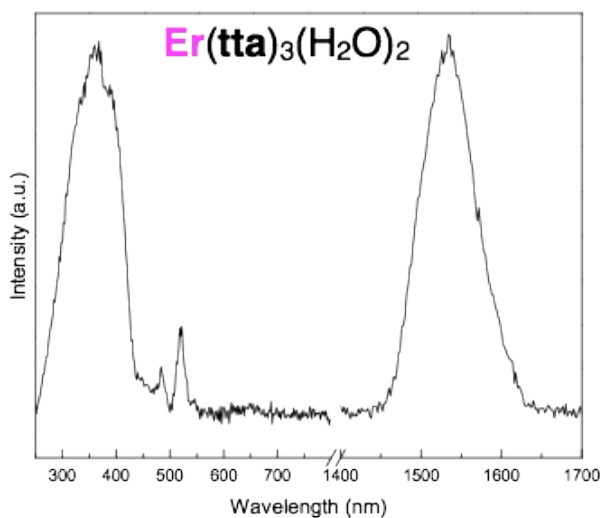

Fig. S4 Combined excitation-emission spectra of  $\text{Er}^{3+}$   $\beta$ -diketonate complexes (the spectra were recorded by exciting into the maximum of the broad excitation band and observing at the maximum of the strongest emission peak).

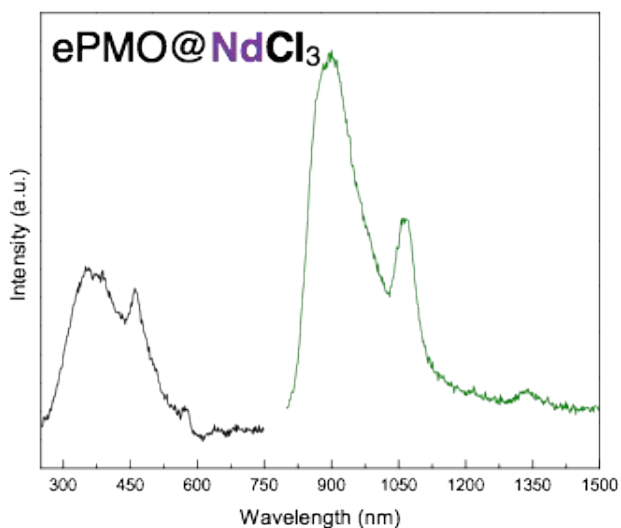

Fig. S5 Combined excitation-emission spectra of dppz-ePMO@NdCl<sub>3</sub> material (the spectra were recorded by exciting into the maximum of the broad excitation band and observing at the maximum of the strongest emission peak).

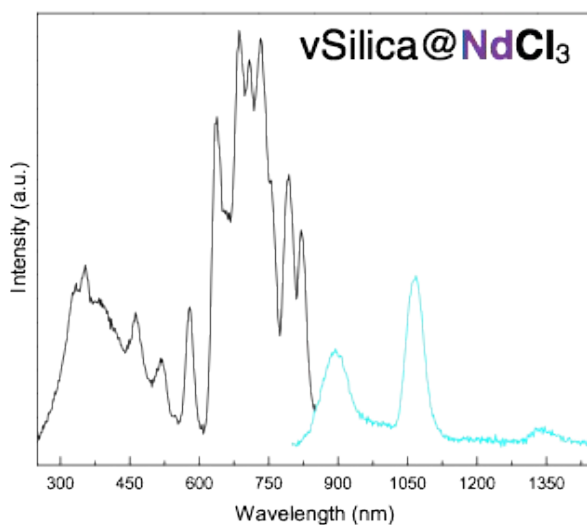

Fig. S6 Combined excitation-emission spectra of dppz-vSilica@NdCl<sub>3</sub> material (the spectra were recorded by exciting into the maximum of the

broad excitation band and observing at the maximum of the strongest emission peak).

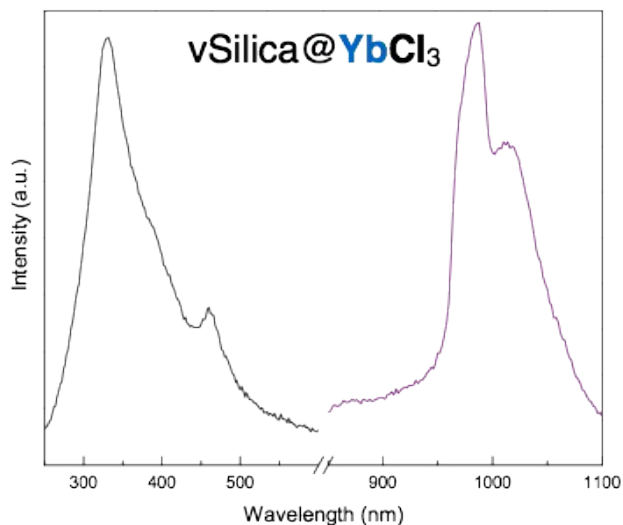

Fig. S7 Combined excitation-emission spectra of dppz-vSilica@YbCl<sub>3</sub> material (the spectra were recorded by exciting into the maximum of the broad excitation band and observing at the maximum of the strongest emission peak).\*

\*The signal of the ePMO@YbCl<sub>3</sub> material was too weak to record a sufficient excitation and emission spectrum. Also almost no signal was detected for the dppz-vSilica@ErCl<sub>3</sub> and dppz-ePMO@ErCl<sub>3</sub> materials, therefore they are not presented in the SI.

Table S1. Assignment of peaks observed in the excitation and emission spectra of dppz-ePMO@LnL<sub>3</sub> and dppz-vSilica@LnL<sub>3</sub> samples.

| dppz-ePMO@Nd(tta) <sub>3</sub>    |                                                                                                      |                 |                                        |
|-----------------------------------|------------------------------------------------------------------------------------------------------|-----------------|----------------------------------------|
| excitation                        |                                                                                                      | emission        |                                        |
| wavelength [nm]                   | transition                                                                                           | wavelength [nm] | transition                             |
| 352.0                             | $\pi \rightarrow \pi^*$                                                                              | 898.0           | ${}^4F_{3/2} \rightarrow {}^4I_{9/2}$  |
| 465.0                             | ${}^4G_{11/2}, {}^2D_{3/2}, {}^2P_{3/2},$<br>${}^2G_{9/2}, {}^2K_{15/2} \leftarrow$<br>${}^4I_{9/2}$ | 1064.0          | ${}^4F_{3/2} \rightarrow {}^4I_{11/2}$ |
| 517.0                             | ${}^4G_{9/2}, {}^4G_{7/2}, {}^3K_{13/2}$<br>$\leftarrow {}^4I_{9/2}$                                 | 1335.0          | ${}^4F_{3/2} \rightarrow {}^4I_{13/2}$ |
| 578.0                             | ${}^2G_{7/2}, {}^4G_{5/2} \leftarrow {}^4I_{9/2}$                                                    |                 |                                        |
| 685.0                             | ${}^4F_{9/2} \leftarrow {}^4I_{9/2}$                                                                 |                 |                                        |
| 740.0                             | ${}^4S_{3/2}, {}^4F_{7/2} \leftarrow {}^4I_{9/2}$                                                    |                 |                                        |
| dppz-ePMO@Nd(bta) <sub>3</sub>    |                                                                                                      |                 |                                        |
| excitation                        |                                                                                                      | emission        |                                        |
| wavelength [nm]                   | transition                                                                                           | wavelength [nm] | transition                             |
| 327.0                             | $\pi \rightarrow \pi^*$                                                                              | 895.0           | ${}^4F_{3/2} \rightarrow {}^4I_{9/2}$  |
| 461.0                             | ${}^4G_{11/2}, {}^2D_{3/2}, {}^2P_{3/2},$<br>${}^2G_{9/2}, {}^2K_{15/2} \leftarrow$<br>${}^4I_{9/2}$ | 1064.0          | ${}^4F_{3/2} \rightarrow {}^4I_{11/2}$ |
| 517.0                             | ${}^4G_{9/2}, {}^4G_{7/2}, {}^3K_{13/2}$<br>$\leftarrow {}^4I_{9/2}$                                 | 1336.0          | ${}^4F_{3/2} \rightarrow {}^4I_{13/2}$ |
| 576.0                             | ${}^2G_{7/2}, {}^4G_{5/2} \leftarrow {}^4I_{9/2}$                                                    |                 |                                        |
| 689.0                             | ${}^4F_{9/2} \leftarrow {}^4I_{9/2}$                                                                 |                 |                                        |
| 738.0                             | ${}^4S_{3/2}, {}^4F_{7/2} \leftarrow {}^4I_{9/2}$                                                    |                 |                                        |
| dppz-vSilica@Nd(tta) <sub>3</sub> |                                                                                                      |                 |                                        |
| excitation                        |                                                                                                      | emission        |                                        |
| wavelength [nm]                   | transition                                                                                           | wavelength [nm] | transition                             |
| 350.0                             | $\pi \rightarrow \pi^*$                                                                              | 899.0           | ${}^4F_{3/2} \rightarrow {}^4I_{9/2}$  |
| 462.0                             | ${}^4G_{11/2}, {}^2D_{3/2}, {}^2P_{3/2},$<br>${}^2G_{9/2}, {}^2K_{15/2} \leftarrow$<br>${}^4I_{9/2}$ | 1065.0          | ${}^4F_{3/2} \rightarrow {}^4I_{11/2}$ |
| 521.0                             | ${}^4G_{9/2}, {}^4G_{7/2}, {}^3K_{13/2}$<br>$\leftarrow {}^4I_{9/2}$                                 | 1335.0          | ${}^4F_{3/2} \rightarrow {}^4I_{13/2}$ |
| 579.0                             | ${}^2G_{7/2}, {}^4G_{5/2} \leftarrow {}^4I_{9/2}$                                                    |                 |                                        |
| 680.0                             | ${}^4F_{9/2} \leftarrow {}^4I_{9/2}$                                                                 |                 |                                        |
| 739.0                             | ${}^4S_{3/2}, {}^4F_{7/2} \leftarrow {}^4I_{9/2}$                                                    |                 |                                        |
| dppz-vSilica@Nd(bta) <sub>3</sub> |                                                                                                      |                 |                                        |
| excitation                        |                                                                                                      | emission        |                                        |
| wavelength [nm]                   | transition                                                                                           | wavelength [nm] | transition                             |
| 336.0                             | $\pi \rightarrow \pi^*$                                                                              | 898.0           | ${}^4F_{3/2} \rightarrow {}^4I_{9/2}$  |
| 461.0                             | ${}^4G_{11/2}, {}^2D_{3/2}, {}^2P_{3/2},$<br>${}^2G_{9/2}, {}^2K_{15/2} \leftarrow$<br>${}^4I_{9/2}$ | 1069.0          | ${}^4F_{3/2} \rightarrow {}^4I_{11/2}$ |
| 515.0                             | ${}^4G_{9/2}, {}^4G_{7/2}, {}^3K_{13/2}$<br>$\leftarrow {}^4I_{9/2}$                                 | 1335.0          | ${}^4F_{3/2} \rightarrow {}^4I_{13/2}$ |
| 576.0                             | ${}^2G_{7/2}, {}^4G_{5/2} \leftarrow {}^4I_{9/2}$                                                    |                 |                                        |
| 740.0                             | ${}^4S_{3/2}, {}^4F_{7/2} \leftarrow {}^4I_{9/2}$                                                    |                 |                                        |

I



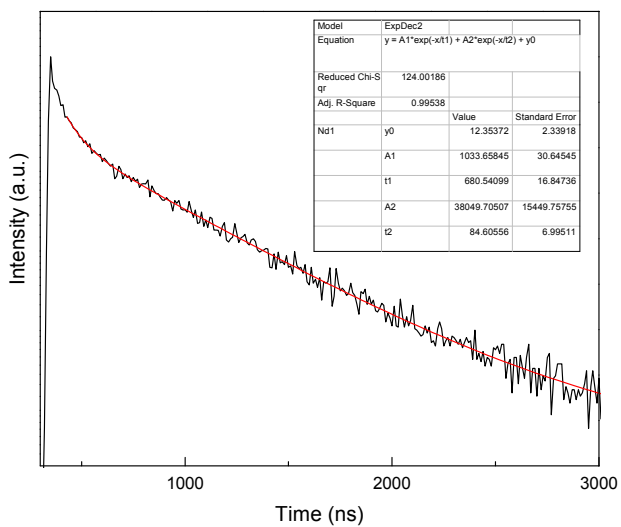

Fig. S8 Decay profile of dppz-ePMO@Nd(tta)<sub>3</sub>.

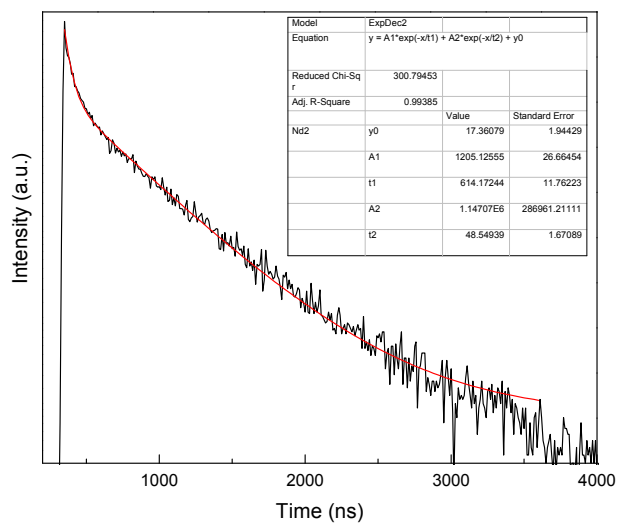

Fig. S9 Decay profile of dppz-ePMO@Nd(bta)<sub>3</sub>.

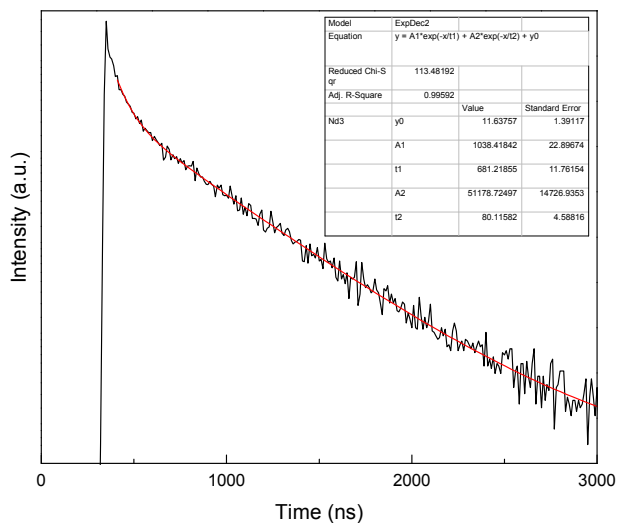

Fig. S10 Decay profile of dppz-vSilica@Nd(tta)<sub>3</sub>.

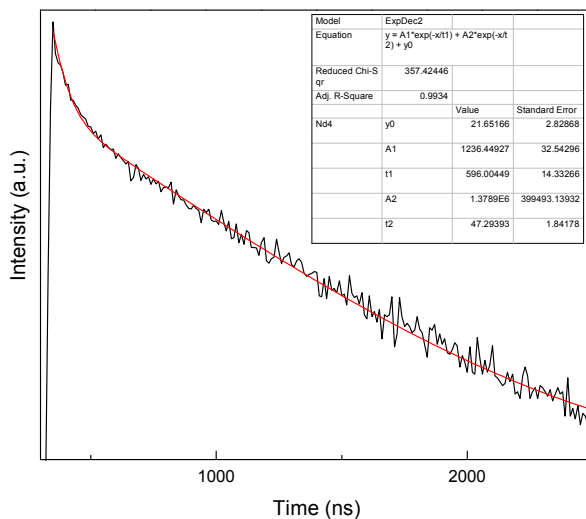

Fig. S11 Decay profile of dppz-vSilica@Nd(bta)<sub>3</sub>.

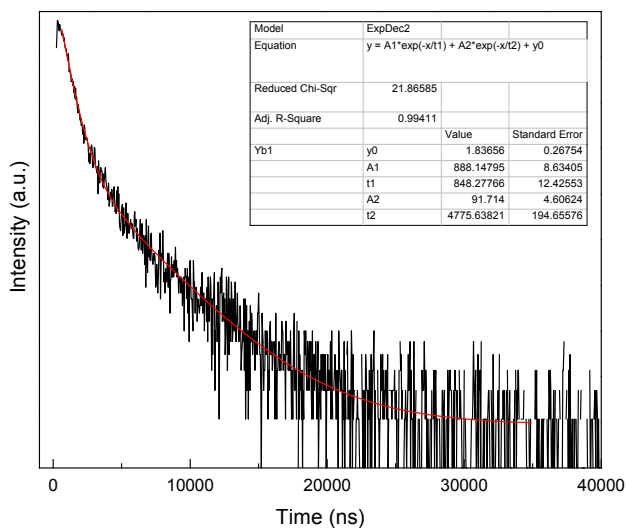

Fig. S12 Decay profile of dppz-ePMO@Yb(tta)<sub>3</sub>.

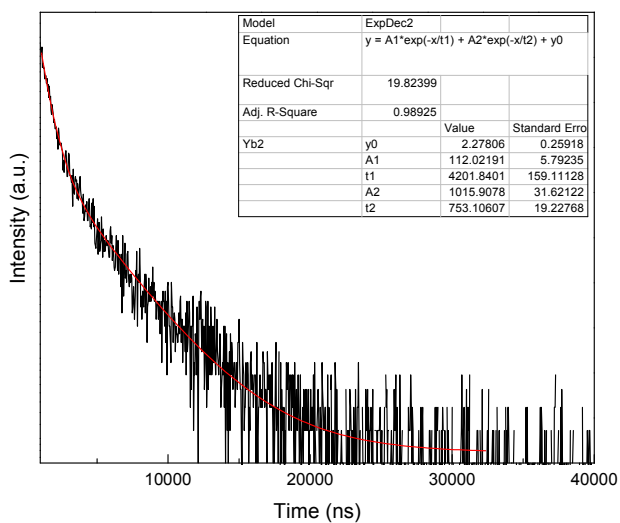

Fig. S13 Decay profile of dppz-ePMO@Yb(bta)<sub>3</sub>.

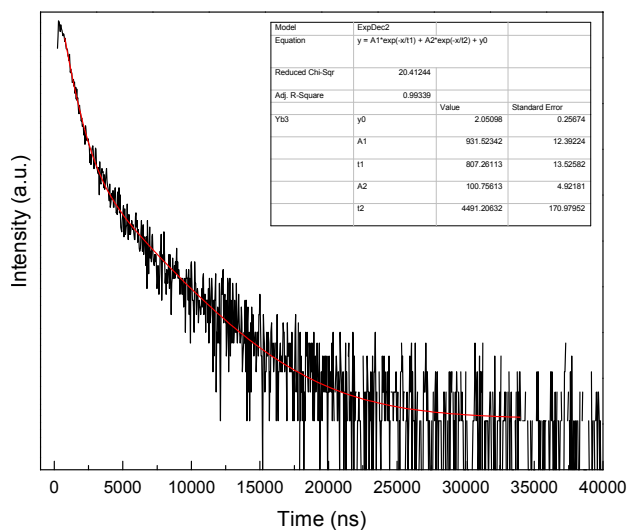

Fig. S14 Decay profile of dppz-vSilica@Yb(tta)<sub>3</sub>.

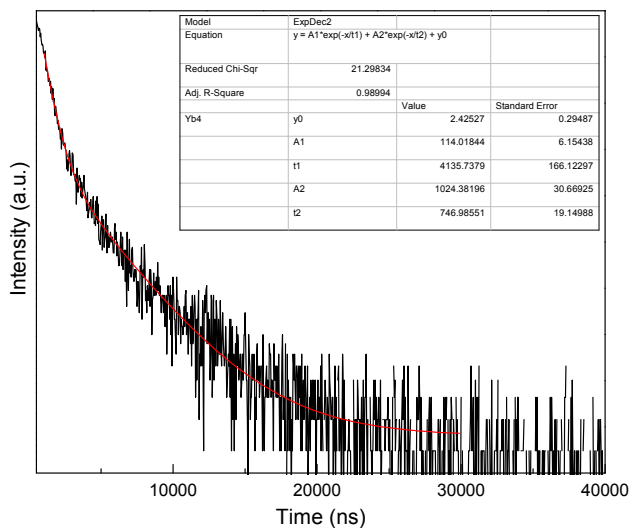

Fig. S15 Decay profile of dppz-vSilica@Yb(bta)<sub>3</sub>.

$$\tau_{av} = \frac{A_1\tau_f^2 + A_2\tau_s^2}{A_1\tau_f + A_2\tau_s} \quad (S1)$$

where  $\tau_f$  is the fast decay time and  $\tau_s$  is the slow decay time.

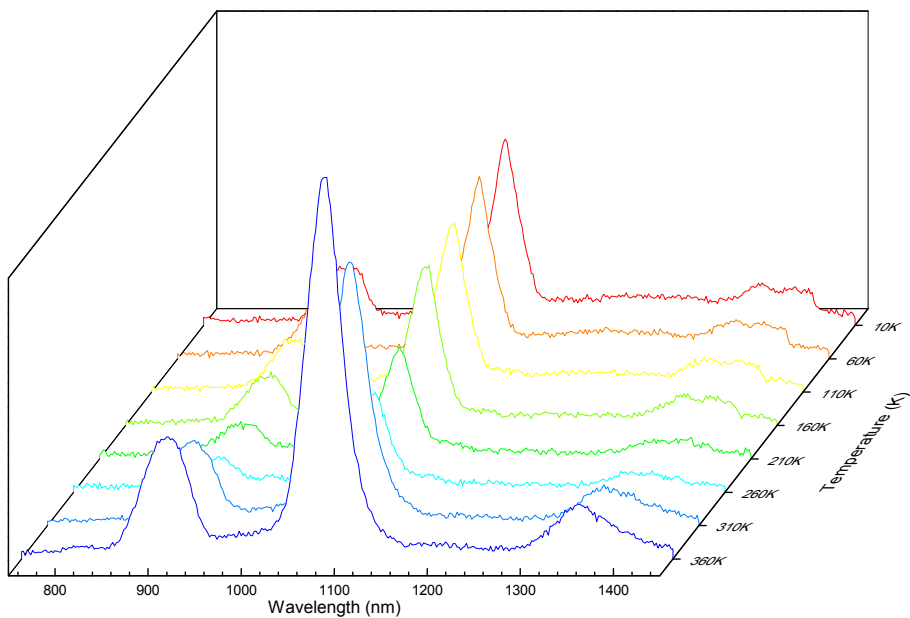

Fig. S16 Temperature dependent luminescence of  $\text{Nd}(\text{tta})_3 \cdot 2\text{H}_2\text{O}$  recorded in the 10 – 360 K temperature range.
